# Supplementary material for: The Development of Human Ex Vivo Models of Inflammatory Skin Conditions
Source: MDPI journal article supplement (doi:10.3390/ijms242417255), 2023-12-08
Supplement: s1 [file s1]

## Supplementary Materials

Supplementary Table 1. Antibodies used in immunohistochemistry

| Antibody       | Clone      | Vendor                     | HIAR | Dilution |
|----------------|------------|----------------------------|------|----------|
| Anti-CD3       | SP7        | Abcam; Ab16669             | pH 6 | 1:100    |
| Anti-CD45      | EP322Y     | Abcam; Ab40763             | pH 9 | 1:100    |
| Anti-CD68      | EPR20545   | Abcam;<br>Ab213363         | pH 9 | 1:600    |
| Anti-Filaggrin | FLG01      | ThermoFisher;<br>MA5-13440 | pH 9 | 1:400    |
| Anti-Loricrin  | Polyclonal | Abcam; Ab85679             | pH 6 | 1:250    |

Supplementary Table 2. Donor demographics

| Ethnicity        | Age | Sex    | Models Used |
|------------------|-----|--------|-------------|
| African American | 54  | Female | AG, IR, CS  |
| Hispanic         | 60  | Female | AG, CS      |
| Hispanic         | 26  | Female | CS          |
| Hispanic         | 63  | Female | AG, IR      |
| Caucasian        | 45  | Female | AG, IR      |
| Caucasian        | 63  | Female | IR, CS      |
